# Supplementary material for: In Vitro Evaluation of the Inhibitory Activity of Different Selenium Chemical Forms on the Growth of a Fusarium proliferatum Strain Isolated from Rice Seedlings
Source: MDPI journal article supplement (doi:10.3390/plants10081725), 2021-08-20
Supplement: s1 [file s1]

Table S1 . Liquid chromatography-inductively coupled plasma mass spectrometry (LC-ICP-MS/MS) conditions.

| LC conditions                |                                                    |
|------------------------------|----------------------------------------------------|
| Instrument                   | Agilent 1260 Infinity II                           |
| Column 1 (anion exchange)    | Hamilton, PRP-X100, 250 x 4.6 mm, 5µm particlesize |
| Mobile phase                 | Ammoniumacetate 200mM, pH=5.2, 2% methanol         |
| Elution mode                 | Gradient mode:                                     |
|                              | 0-9 min 100% mobile phase A                        |
|                              | 9-20min 100%mobile phase B                         |
| Flow rate                    | 1 mL min <sup>-1</sup>                             |
| Injection volume             | 80 µL                                              |
| ICP-MS/MS conditions         |                                                    |
| Instrument                   | Agilent 8900                                       |
| Rf power (W)                 | 1550                                               |
| Argon gas flow rate (L/min): |                                                    |
| Plasma gas                   | 15.0                                               |
| Auxiliary gas                | 0.90                                               |
| Nebulizer gas                | 1.05                                               |
| Ion sampling depth (mm)      | 7.0                                                |
| MS mode                      | MS/MS                                              |
| Measured mass (m/z)          | 78 (Q1) ⇒ 94 (Q2)                                  |
| Cell gas                     | O <sub>2</sub> , 25% (0.37 mLmin <sup>-1</sup> )   |
